# Supplementary material for: Fluorescence-detection size-exclusion chromatography utilizing nanobody technology for expression screening of membrane proteins
Source: PubMed Central journal article supplement (PMC7979870; doi:10.1038/s42003-021-01891-y), 2021-03-19
Supplement: 42003_2021_1891_MOESM2_ESM.pdf [file 42003_2021_1891_MOESM2_ESM.pdf]

## **Supplementary Information**

### **Fluorescence-detection size-exclusion chromatography utilizing nanobody technology for expression screening of membrane proteins**

Fei Jin<sup>1</sup>, Cheng Shen<sup>1</sup>, Yao Wang<sup>1</sup>, Mengqi Wang<sup>1</sup>, Minxuan Sun<sup>1</sup>, Motoyuki Hattori<sup>1</sup>.

*<sup>1</sup>State Key Laboratory of Genetic Engineering, Shanghai Key Laboratory of Bioactive Small Molecules, Collaborative Innovation Center of Genetics and Development, Department of Physiology and Biophysics, School of Life Sciences, Fudan University, Shanghai 200438, China*

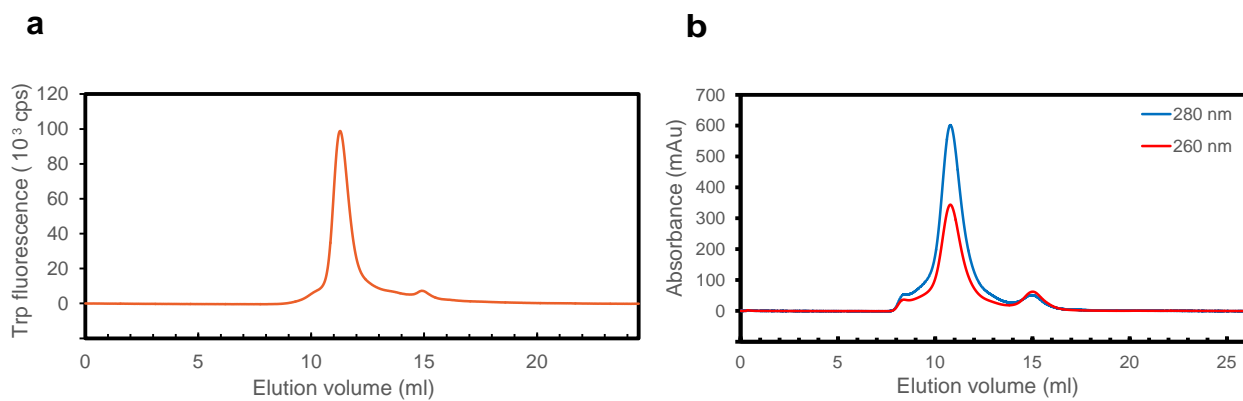

**Supplementary Fig. 1 Amphipol reconstitution of OIZAC**

(a) FSEC trace of NaPol-reconstituted OIZAC on a small scale, as detected by Trp fluorescence. (b) Size-exclusion chromatography of NaPol-reconstituted OIZAC, as detected by UV absorbance.

**a**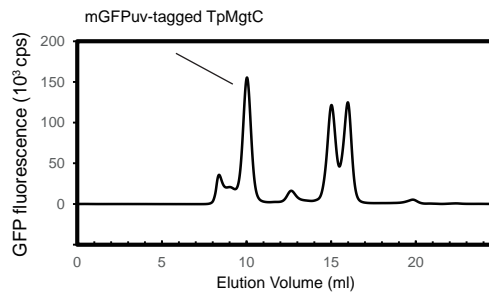**b**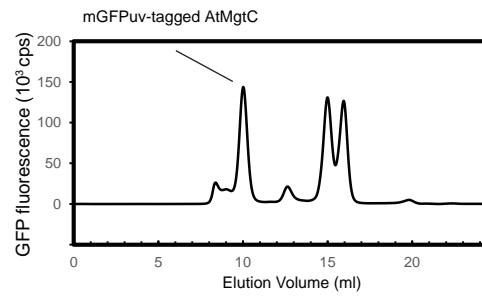**c**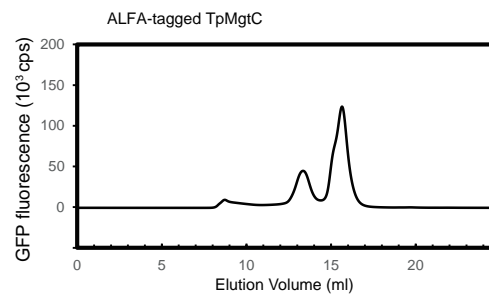**d**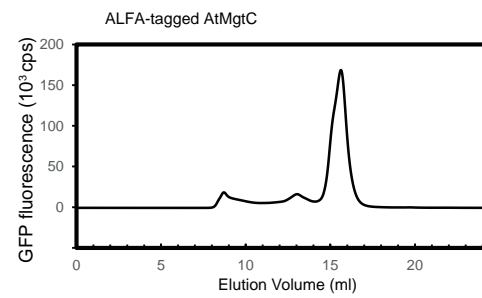

**Supplementary Fig. 2 Expression screening of MgtC by GFP-fusion FSEC**  
(a, b) FSEC traces of C-terminally mGFPuv-tagged TpMgtC (Accession Number: WP\_038038224.1) and AtMgtC (WP\_043965058.1), as detected by mGFPuv fluorescence. (c, d) FSEC-Nb traces of ALFA-tagged TpMgtC and AtMgtC with mEGFP-tagged NbALFA, as detected by mEGFP fluorescence.

| <b>No</b> | <b>Species</b>                          | <b>Accession Number</b> | <b>Abbreviation</b> |
|-----------|-----------------------------------------|-------------------------|---------------------|
| 1         | <i>Halobacillus halophilus</i>          | WP_014641389.1          | HhMgtC              |
| 2         | <i>Lactococcus lactis</i>               | WP_021722089.1          | LlMgtC              |
| 3         | <i>Mycobacterium aromaticivorans</i>    | WP_051660484.1          | MaMgtC              |
| 4         | <i>Virgibacillus halodenitrificans</i>  | WP_060678220.1          | VhMgtC              |
| 5         | <i>Klebsiella oxytoca</i>               | WP_049112851.1          | KoMgtC              |
| 6         | <i>Yersinia ruckeri</i>                 | WP_004722955.1          | YrMgtC              |
| 7         | <i>Elizabethkingia meningoseptica</i>   | WP_019051280.1          | EmMgtC              |
| 8         | <i>Methylophilus</i> sp.                | WP_049639727.1          | MsMgtC              |
| 9         | <i>Pedobacter agri</i>                  | WP_010599226.1          | PaMgtC              |
| 10        | <i>Thermobacillus composti</i>          | WP_015253117.1          | TcMgtC              |
| 11        | <i>Thermobispora bispora</i>            | WP_013130974.1          | TbMgtC              |
| 12        | <i>Brevibacillus brevis</i>             | WP_017246836.1          | BbMgtC              |
| 13        | <i>Vibrio vulnificus</i>                | WP_045614446.1          | VvMgtC              |
| 14        | <i>Clostridium acetobutylicum</i>       | WP_010966920.1          | CaMgtC              |
| 15        | <i>Xanthobacter autotrophicus</i>       | WP_012113199.1          | XaMgtC              |
| 16        | <i>Bacillus cereus</i>                  | KYQ01271.1              | BcMgtC              |
| 17        | <i>Gracilibacillus boracitolerans</i>   | GAE93792.1              | GbMgtC              |
| 18        | <i>Lactobacillus paracasei</i>          | WP_016383475.1          | LpMgtC              |
| 19        | <i>Rubrobacter xylanophilus</i>         | WP_011565853.1          | RxMgtC              |
| 20        | <i>Lysinibacillus boronitolerans</i>    | WP_016994404.1          | LbMgtC              |
| 21        | <i>Desulfurispora thermophila</i>       | WP_018084380.1          | DtMgtC              |
| 22        | <i>Thermanaerotherix daxensis</i>       | WP_054522013.1          | TdMgtC              |
| 23        | <i>Thermocrinis albus</i>               | WP_012992317.1          | TaMgtC              |
| 24        | <i>Sphaerobacter thermophilus</i>       | ACZ39839.1              | StMgtC              |
| 25        | <i>Thermorudis peleae</i>               | WP_038038224.1          | TpMgtC              |
| 26        | <i>Rubellimicrobium thermophilum</i>    | WP_040645344.1          | RtMgtC              |
| 27        | <i>Quasibacillus thermotolerans</i>     | WP_039233714.1          | QtMgtC              |
| 28        | <i>Thermincola ferriacetica</i>         | WP_083436703.1          | TfMgtC              |
| 29        | <i>Caldicellulosiruptor naganensis</i>  | WP_045165679.1          | CnMgtC              |
| 30        | <i>Anoxybacillus thermarum</i>          | WP_043965058.1          | AtMgtC              |
| 31        | <i>Desulfofundulus</i>                  | WP_027355452.1          | DeMgtC              |
| 32        | <i>Thermodesulfobium narugense</i>      | WP_013756617.1          | TnMgtC              |
| 33        | <i>Serratia</i>                         | WP_006319255.1          | SeMgtC              |
| 34        | <i>Bacillus mannanilyticus</i>          | WP_025026422.1          | BmMgtC              |
| 35        | <i>Alkalihalobacillus akibai</i>        | WP_035663104.1          | AaMgtC              |
| 36        | <i>Hungateiclostridium thermocellum</i> | WP_003513884.1          | HtMgtC              |
| 37        | <i>Stenotrophomonas pictorum</i>        | WP_054658310.1          | SpMgtC              |
| 38        | <i>Prevotella maculosa</i>              | WP_019967744.1          | PmMgtC              |
| 39        | <i>Prevotella salivae</i>               | EFV04256.1              | PsMgtC              |

|    |                                     |                |         |
|----|-------------------------------------|----------------|---------|
| 40 | <i>Prevotella veroralis</i>         | WP_018911053.1 | PvMgtC  |
| 41 | <i>Prevotella</i> sp.               | WP_177216065.1 | PspMgtC |
| 42 | Peptococcaceae bacterium            | KJS46311.1     | PbMgtC  |
| 43 | Sphingobacteriales bacterium        | OJV97509.1     | SbMgtC  |
| 44 | <i>Yersinia pestis</i>              | WP_015683614.1 | YpMgtC  |
| 45 | <i>Natronincola peptidivorans</i>   | WP_090446121.1 | NpMgtC  |
| 46 | <i>Myxococcus hansupus</i>          | WP_021781415.1 | MhMgtC  |
| 47 | <i>Obesumbacterium proteus</i>      | WP_046459523.1 | OpMgtC  |
| 48 | <i>Limihaloglobus sulfuriphilus</i> | WP_146682549.1 | LsMgtC  |
| 49 | <i>Lactobacillus kefiri</i>         | WP_054769137   | LkMgtC  |
| 50 | <i>Dictyoglomus</i> sp.             | PMQ01502.1     | DspMgtC |
| 51 | <i>Bacillus</i> sp.                 | WP_094032362.1 | BspMgtC |
| 52 | <i>Sphingobacterium detergens</i>   | WP_120259343.1 | SdMgtC  |
| 53 | <i>Chryseobacterium culicis</i>     | WP_105683769   | CcMgtC  |
| 54 | Lactobacillaceae                    | WP_021357857.1 | LaMgtC  |
| 55 | <i>Bacteroides eggerthii</i>        | WP_118363478.1 | BeMgtC  |
| 56 | <i>Acidaminococcus</i>              | WP_016459447.1 | AcMgtC  |
| 57 | <i>Tissierella</i> sp. P1           | WP_094904138.1 | TspMgtC |
| 58 | <i>Mucilaginibacter</i> sp.         | WP_067187481.1 | MspMgtC |
| 59 | <i>Erwinia typographi</i>           | WP_034897147.1 | EtMgtC  |
| 60 | <i>Clostridium tepidiprofundum</i>  | WP_066821746.1 | CtMgtC  |
| 61 | <i>Arthrobacter</i> sp.             | WP_155850019.1 | AsMgtC  |
| 62 | Chitinophagaceae bacterium          | WP_157444983.1 | CbMgtC  |
| 63 | <i>Risunbinella massiliensis</i>    | WP_044641850.1 | RmMgtC  |
| 64 | Deltaproteobacteria bacterium       | OGR23206.1     | DbMgtC  |
| 65 | <i>Carnobacterium iners</i>         | WP_085559504.1 | CiMgtC  |
| 66 | <i>Lactobacillus farraginis</i>     | KRM01365.1     | LfMgtC  |
| 67 | <i>Thermosyntropha lipolytica</i>   | WP_073089568.1 | TI MgtC |
| 68 | <i>Acidobacteria</i> bacterium      | PYX87356.1     | AbMgtC  |

**Supplementary Table 1 MgtC orthologs for GFP fusion-based FSEC screening**
