# Supplementary material for: Fluorescence-detection size-exclusion chromatography utilizing nanobody technology for expression screening of membrane proteins
Source: PubMed Central journal article supplement (PMC7979870; doi:10.1038/s42003-021-01891-y), 2021-03-19
Supplement: 42003_2021_1891_MOESM3_ESM.pdf [file 42003_2021_1891_MOESM3_ESM.pdf]

## **Description of Additional Supplementary Files**

**File name:** Supplementary Data

**Description:** All source data underlying the graphs and charts.
